# Supplementary material for: Age-Related Dietary Habits and Blood Biochemical Parameters in Patients with and without Steatosis—MICOL Cohort
Source: MDPI journal article supplement (doi:10.3390/nu15184058), 2023-09-19
Supplement: s1 [file s1]

Supplementary Materials

Table S1. Dietary daily intake of 28 food groups between age groups, among steatosis and non steatosis subjects in the MICOL cohort, stratified by gender.

| Food-Groups *            | Adults<br>(n=726) |                    |                   |                  |                    |               | Elderly<br>(n=757) |                    |             |                  |                    |             |
|--------------------------|-------------------|--------------------|-------------------|------------------|--------------------|---------------|--------------------|--------------------|-------------|------------------|--------------------|-------------|
|                          | Steatosis         |                    |                   |                  |                    |               | Steatosis          |                    |             |                  |                    |             |
|                          | No<br>(n=320)     |                    | p ^               | Yes<br>(n=406)   |                    | p ^           | No<br>(n=334)      |                    | p ^         | Yes<br>(n=423)   |                    | p ^         |
|                          | Males<br>(n=140)  | Females<br>(n=180) |                   | Males<br>(n=269) | Females<br>(n=137) |               | Males<br>(n=191)   | Females<br>(n=143) |             | Males<br>(n=249) | Females<br>(n=174) |             |
| Dairy                    | 93.83±100.28      | 90.75±103.67       | 0.39              | 85.11±88.51      | 99.88±133.27       | 0.37          | 44.87±67.25        | 52.39±76.89        | 0.75        | 64.60±108.39     | 66.79±95.27        | 0.38        |
| Low Fat Dairy            | 68.52±106.69      | 78.70±100.56       | 0.53              | 69.84±100.47     | 91.59±119.39       | <b>0.006</b>  | 51.68±84.51        | 61.78±97.41        | 0.61        | 61.80±106.16     | 68.71±95.59        | 0.07        |
| Eggs                     | 9.27±7.97         | 11.64±10.91        | <b>0.03</b>       | 9.30±8.85        | 9.58±7.85          | 0.28          | 8.16±7.13          | 7.81±5.68          | 0.60        | 8.70±6.47        | 7.62±6.35          | <b>0.03</b> |
| White Meat               | 26.88±26.01       | 28.73±33.10        | 0.86              | 24.46±27.00      | 30.32±30.13        | <b>0.01</b>   | 15.20±22.69        | 13.73±20.59        | 0.68        | 15.85±22.55      | 19.81±37.45        | 0.31        |
| Red Meat                 | 36.41±30.18       | 27.56±32.36        | <b>&lt;0.0001</b> | 32.28±26.87      | 28.29±20.80        | 0.35          | 19.22±35.70        | 14.11±19.56        | 0.18        | 24.06±32.64      | 18.48±21.20        | 0.34        |
| Processed Meat           | 6.59±6.71         | 5.65±9.20          | <b>0.01</b>       | 6.97±9.38        | 5.58±6.33          | 0.27          | 3.86±13.44         | 2.01±3.72          | 0.06        | 4.11±7.56        | 3.39±5.45          | 0.59        |
| Fish                     | 25.25±25.27       | 25.09±23.80        | 0.94              | 23.57±24.23      | 25.21±24.85        | 0.37          | 14.53±25.55        | 13.17±20.59        | 0.55        | 17.33±23.31      | 17.33±23.33        | 0.84        |
| Seafood/Shellfish        | 5.50±6.80         | 6.66±20.09         | 0.19              | 6.41±13.05       | 5.59±5.58          | 0.53          | 2.92±5.24          | 2.34±5.34          | <b>0.05</b> | 4.04±5.99        | 3.64±7.73          | 0.39        |
| Leafy Vegetables         | 48.10±50.98       | 69.87±77.49        | <b>0.007</b>      | 41.46±46.56      | 66.28±87.94        | <b>0.004</b>  | 32.93±58.62        | 32.64±45.56        | 0.71        | 37.71±56.15      | 44.18±61.59        | 0.09        |
| Fruiting Vegetables      | 75.49±69.33       | 106.08±104.60      | <b>0.007</b>      | 71.66±73.83      | 106.73±104.76      | <b>0.0004</b> | 48.93±67.46        | 49.82±76.98        | 0.62        | 62.61±76.41      | 67.89±82.37        | 0.37        |
| Root Vegetables          | 16.29±36.50       | 22.46±38.24        | <b>0.003</b>      | 14.72±31.21      | 16.27±28.07        | 0.52          | 11.13±11.10        | 12.42±14.42        | 0.42        | 11.11±13.82      | 14.14±31.55        | 0.58        |
| Other Vegetables         | 73.00±82.11       | 99.79±109.74       | <b>0.04</b>       | 62.70±77.54      | 98.25±120.19       | <b>0.001</b>  | 42.21±59.18        | 50.09±80.91        | 0.97        | 57.94±82.76      | 58.46±75.15        | 0.37        |
| Legumes                  | 30.17±22.13       | 34.41±43.79        | 0.86              | 26.41±26.88      | 29.18±22.93        | 0.10          | 20.84±22.82        | 18.03±20.84        | 0.36        | 25.53±31.86      | 27.13±30.81        | 0.37        |
| Potatoes                 | 13.91±14.54       | 13.97±24.42        | 0.09              | 12.75±13.18      | 9.47±8.90          | <b>0.006</b>  | 12.62±10.91        | 11.95±7.85         | 0.90        | 15.61±24.96      | 13.68±14.03        | 0.84        |
| Fruits                   | 354.66±412.29     | 483.07±504.04      | <b>0.02</b>       | 388.24±461.56    | 436.61±477.18      | 0.15          | 276.27±389.98      | 290.51±450.56      | 0.81        | 322.02±429.18    | 341.83±418.45      | 0.36        |
| Nuts                     | 3.37±4.41         | 6.57±10.37         | <b>0.03</b>       | 3.56±6.27        | 3.71±6.25          | 0.39          | 2.35±2.83          | 2.56±3.05          | 0.41        | 2.26±2.80        | 2.83±6.23          | 0.32        |
| Grains                   | 156.90±123.38     | 97.42±90.94        | <b>&lt;0.0001</b> | 147.51±138.72    | 100.73±91.21       | <b>0.008</b>  | 118.19±142.62      | 77.91±90.92        | 0.06        | 117.96±132.62    | 92.40±97.49        | 0.35        |
| Olives and Vegetable Oil | 34.09±24.99       | 32.76±23.04        | 0.92              | 31.43±20.51      | 33.05±23.87        | 0.88          | 30.93±33.18        | 28.67±48.45        | 0.22        | 33.52±33.56      | 43.23±69.61        | 0.34        |

(continue)

| Food-Groups *     | Adults<br>(n=726) |                    |                   |                  |                    |                   | Elderly<br>(n=757) |                    |                   |                  |                    |                   |
|-------------------|-------------------|--------------------|-------------------|------------------|--------------------|-------------------|--------------------|--------------------|-------------------|------------------|--------------------|-------------------|
|                   | Steatosis         |                    |                   |                  |                    |                   | Steatosis          |                    |                   |                  |                    |                   |
|                   | No<br>(n=320)     |                    | p ^               | Yes<br>(n=406)   |                    | p ^               | No<br>(n=334)      |                    | p ^               | Yes<br>(n=423)   |                    | p ^               |
|                   | Males<br>(n=140)  | Females<br>(n=180) |                   | Males<br>(n=269) | Females<br>(n=137) |                   | Males<br>(n=191)   | Females<br>(n=143) |                   | Males<br>(n=249) | Females<br>(n=174) |                   |
| Sweets            | 26.75±53.88       | 29.47±50.78        | 0.67              | 21.38±25.38      | 21.46±24.98        | 0.66              | 11.85±19.48        | 10.87±18.26        | 0.63              | 12.24±19.86      | 18.75±51.15        | 0.11              |
| Sugary            | 16.56±14.90       | 22.76±28.94        | 0.40              | 15.52±20.27      | 14.67±18.16        | 0.85              | 7.38±10.85         | 7.56±11.32         | 0.82              | 7.74±11.08       | 10.56±19.39        | 0.32              |
| Juices            | 12.50±26.74       | 11.80±35.43        | <b>0.01</b>       | 9.94±21.70       | 11.75±34.55        | 0.31              | 7.19±14.26         | 8.12±15.80         | 0.34              | 7.32±12.16       | 6.91±10.20         | 0.50              |
| Caloric Drinks    | 16.33±47.66       | 7.03±19.77         | <b>0.001</b>      | 17.61±63.17      | 9.49±20.72         | <b>0.03</b>       | 7.33±9.67          | 8.55±25.15         | 0.77              | 9.03±23.58       | 13.63±63.42        | 0.07              |
| Ready to Eat Dish | 59.49±63.52       | 49.38±58.10        | 0.10              | 47.51±42.13      | 44.40±32.38        | 0.83              | 18.11±26.24        | 17.15±39.70        | 0.12              | 22.77±41.14      | 21.25±25.76        | 0.56              |
| Coffee            | 65.03±40.39       | 56.02±41.15        | <b>0.03</b>       | 61.70±48.15      | 55.73±39.67        | 0.30              | 29.14±34.89        | 25.09±28.58        | 0.46              | 32.35±36.02      | 32.62±33.27        | 0.72              |
| Wine              | 99.95±136.63      | 51.99±111.39       | <b>0.0001</b>     | 144.42±184.04    | 42.88±66.95        | <b>&lt;0.0001</b> | 147.07±136.14      | 79.82±69.58        | <b>&lt;0.0001</b> | 161.20±161.22    | 81.19±92.00        | <b>&lt;0.0001</b> |
| Beer              | 42.08±87.15       | 10.50±45.35        | <b>0.004</b>      | 64.05±128.50     | 17.41±53.42        | <b>&lt;0.0001</b> | 23.67±52.32        | 15.82±28.05        | 0.66              | 33.60±84.26      | 11.79±26.00        | <b>0.002</b>      |
| Spirits           | 2.70±6.36         | 0.58±1.58          | <b>&lt;0.0001</b> | 2.70±6.67        | 0.87±2.30          | <b>0.0002</b>     | 1.75±4.98          | 0.93±1.32          | 0.22              | 1.97±4.84        | 1.02±2.03          | <b>0.002</b>      |
| Water             | 672.70±323.54     | 711.21±309.66      | 0.17              | 688.67±305.28    | 650.89±285.66      | 0.13              | 671.35±261.87      | 638.01±189.66      | 0.14              | 639.93±205.18    | 651.44±250.07      | 0.94              |
| Total Kcal (die)  | 2041.46±765.80    | 1928.87±679.55     | 0.24              | 2150.47±747.30   | 1897.26±784.01     | <b>0.0002</b>     | 2048.46±672.36     | 1822.68±828.30     | <b>0.004</b>      | 2202.18±733.59   | 2008.81±992.14     | <b>0.0007</b>     |

\* As Mean and Standard Deviation (M±SD). Food groups were calculated on the quantity of daily consumption (grams).

^ Wilcoxon rank-sum test (Mann-Whitney).
